# Supplementary material for: Methylamine lead bromide perovskite/protonated graphitic carbon nitride nanocomposites: interfacial charge carrier dynamics and photocatalysis
Source: Royal Society of Chemistry journal article supplement (doi:10.1039/c7ta08190a), 2017-01-01
Supplement: c7ta08190a1.pdf [file c7ta08190a1.pdf]

## Supporting Information

### **Methylamine lead bromide perovskite/protonated graphitic carbon nitride nanocomposites: interfacial charge carrier dynamics and photocatalysis**

Ying-Chih Pu\*, Hsiao-Chuan Fan, Tzu-Wei Liu and Jie-Wen Chen

Department of Materials Science, National University of Tainan, Tainan 70005,  
Taiwan, ROC

\*E-mail: [ycpu@mail.nutn.edu.tw](mailto:ycpu@mail.nutn.edu.tw)

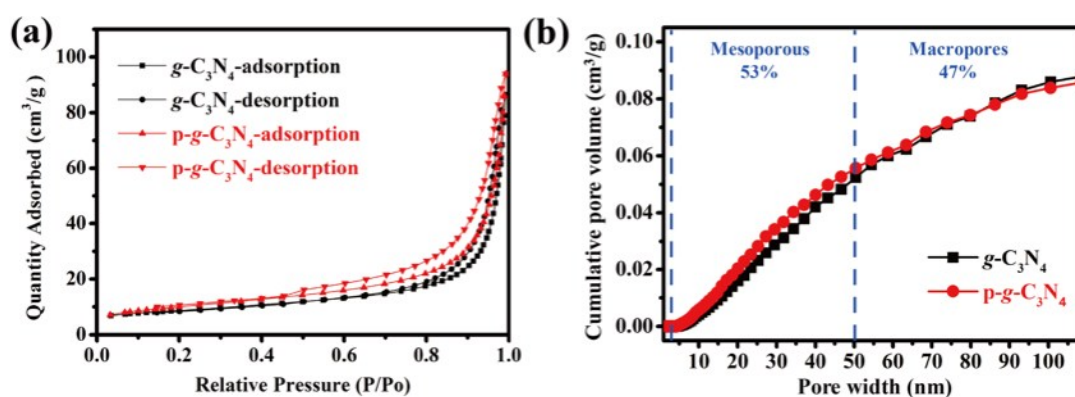

**Fig. S1** (a) Nitrogen adsorption–desorption isotherms and (b) corresponding pore size distribution curves of  $g\text{-C}_3\text{N}_4$  and  $p\text{-}g\text{-C}_3\text{N}_4$ .

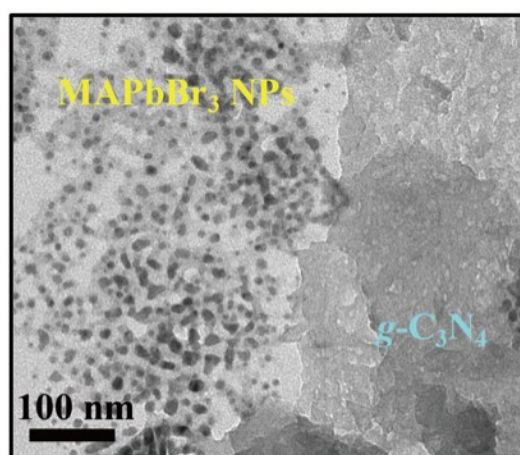

**Fig. S2** TEM image of MAPbBr<sub>3</sub>/g-C<sub>3</sub>N<sub>4</sub> that was prepared by mixing g-C<sub>3</sub>N<sub>4</sub> and precursors solution and then growth through the LARP process. The MAPbBr<sub>3</sub> NPs were observed around the edge and outside of g-C<sub>3</sub>N<sub>4</sub> due to the weak interaction between g-C<sub>3</sub>N<sub>4</sub> and precursor ions, MA<sup>+</sup>, Pb<sup>2+</sup>, and Br<sup>-</sup>.

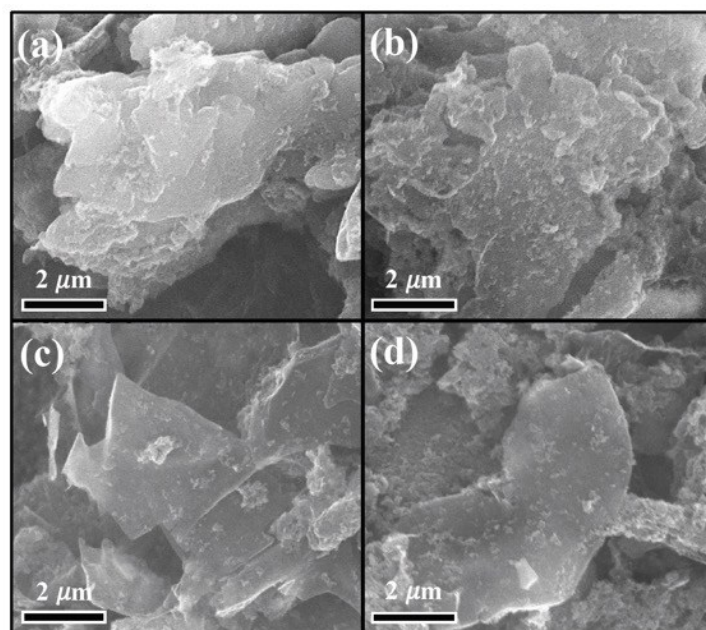

**Fig. S3** SEM images of (a) p-g-C<sub>3</sub>N<sub>4</sub>, (b) MAPbBr<sub>3</sub>/p-g-C<sub>3</sub>N<sub>4</sub>-0.25, (c) MAPbBr<sub>3</sub>/p-g-C<sub>3</sub>N<sub>4</sub>-0.5, and (d) MAPbBr<sub>3</sub>/p-g-C<sub>3</sub>N<sub>4</sub>-1.0. The significant decoration of MAPbBr<sub>3</sub> NPs on p-g-C<sub>3</sub>N<sub>4</sub> can be observed. The decoration density of MAPbBr<sub>3</sub> NPs showed the progressively decrease as the loading amount of p-g-C<sub>3</sub>N<sub>4</sub> increased.

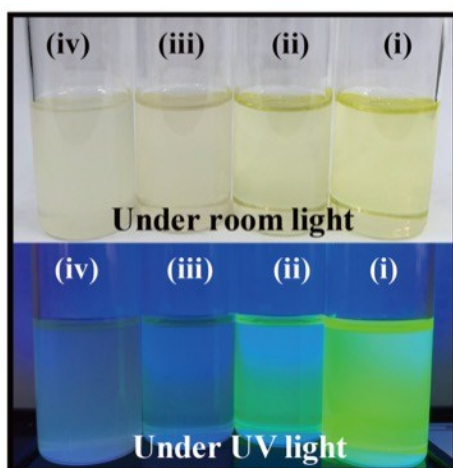

**Fig. S4.** Photograph of i. MAPbBr<sub>3</sub> NP and ii. MAPbBr<sub>3</sub>/p-g-C<sub>3</sub>N<sub>4</sub>-0.25, iii. MAPbBr<sub>3</sub>/p-g-C<sub>3</sub>N<sub>4</sub>-0.5, and iv. MAPbBr<sub>3</sub>/p-g-C<sub>3</sub>N<sub>4</sub>-1.0 NCs solutions under room light and UV light (365 nm) irradiation. The progressively weaker PL emission of

MAPbBr<sub>3</sub> NPs when the incorporated amount of p-g-C<sub>3</sub>N<sub>4</sub> was increased can be seen. Note that the concentration of MAPbBr<sub>3</sub> NPs in MAPbBr<sub>3</sub>/ p-g-C<sub>3</sub>N<sub>4</sub> NHS solutions was kept as a constant with the variation of loading amount of p-g-C<sub>3</sub>N<sub>4</sub> to achieve the meaningful comparison of the PL intensity.

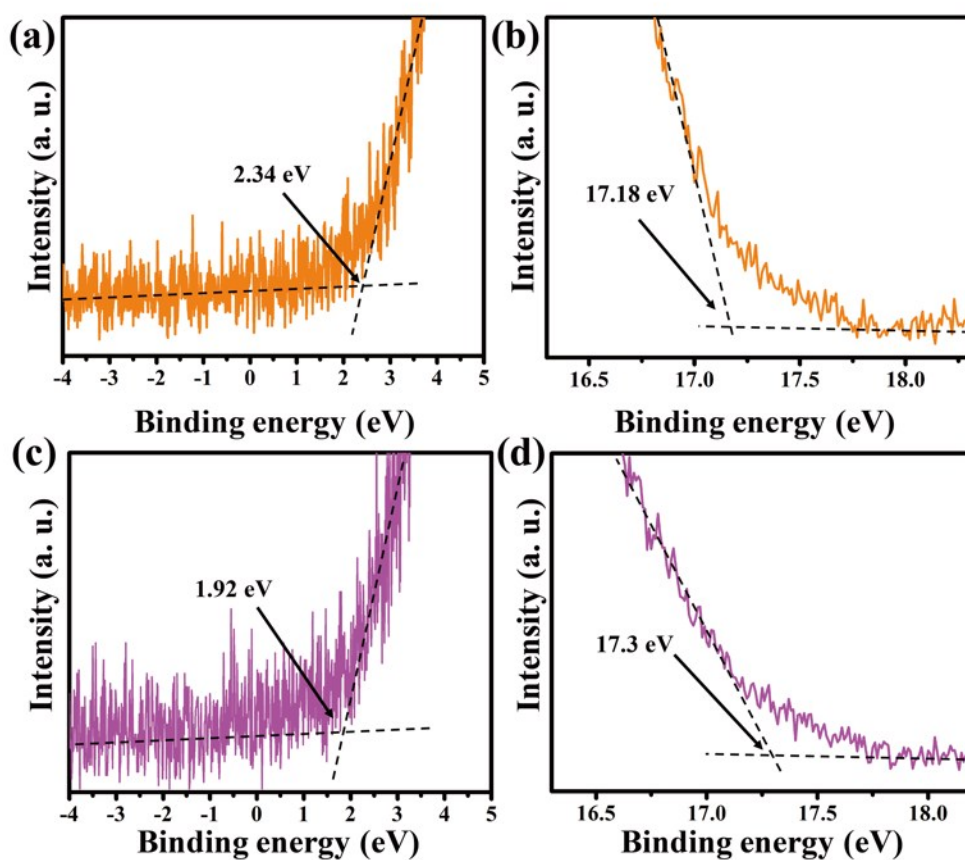

**Fig. S5** UPS spectra as well as linear intersection for (a, b) p-g-C<sub>3</sub>N<sub>4</sub> and (c, d) MAPbBr<sub>3</sub> NPs. The photoemission spectra were collected to zero point as the Fermi level, which revealed the secondary-electron cut-off energy as 17.18 and 17.3 eV for p-g-C<sub>3</sub>N<sub>4</sub> and MAPbBr<sub>3</sub> NPs by linear extrapolation. The difference between the photon energy and the cut-off energy was calculated as the Fermi level ( $E_f$ ) for the tested samples, giving -4.02 and -3.90 eV (vs. vacuum) for p-g-C<sub>3</sub>N<sub>4</sub> and MAPbBr<sub>3</sub> NPs. On the other hand, the spectral feature close to the Fermi level represents the valence band structure of the tested samples. By the linear extrapolation along

the tangent of the spectrum onset, the valence band maximum ( $E_{vb}$ ) with respect to the Fermi level ( $E_{vb}-E_f$ ) can be obtained as 2.34 and 1.92 eV for p-g- $C_3N_4$  and MAPbBr<sub>3</sub> NPs. Therefore, the  $E_{vb}$  of p-g- $C_3N_4$  and MAPbBr<sub>3</sub> NPs can be determined as -6.36 and -5.82 eV (vs. vacuum). Furthermore, the conduction band minimum ( $E_{cb}$ ) of the p-g- $C_3N_4$  and MAPbBr<sub>3</sub> NPs can be obtained by subtracting their optical band gap ( $E_g$ ) values from  $E_{vb}$ , resulting in the  $E_{cb}$  as -3.66 and -3.43 eV (vs. vacuum), respectively.

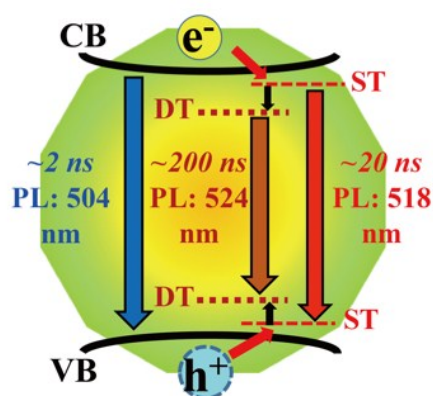

**Fig. S6** Schematic illustration of the band structure and proposed assignment of lifetimes and rate constants of various charge carrier recombination and interfacial transfer processes for MAPbBr<sub>3</sub> NP. First, the photoexcited electron-hole pair in the CB and VB can be trapped into ST states and the further DT states in the time scale of ps. Second, the remained electrons and holes in the CB and VB can recombine through a radiative pathway on the time scale of 2 ns. Last, the trapped electrons and holes in ST and DT states can also recombine through radiative processes on the time scale of 20 and 200 ns, respectively.

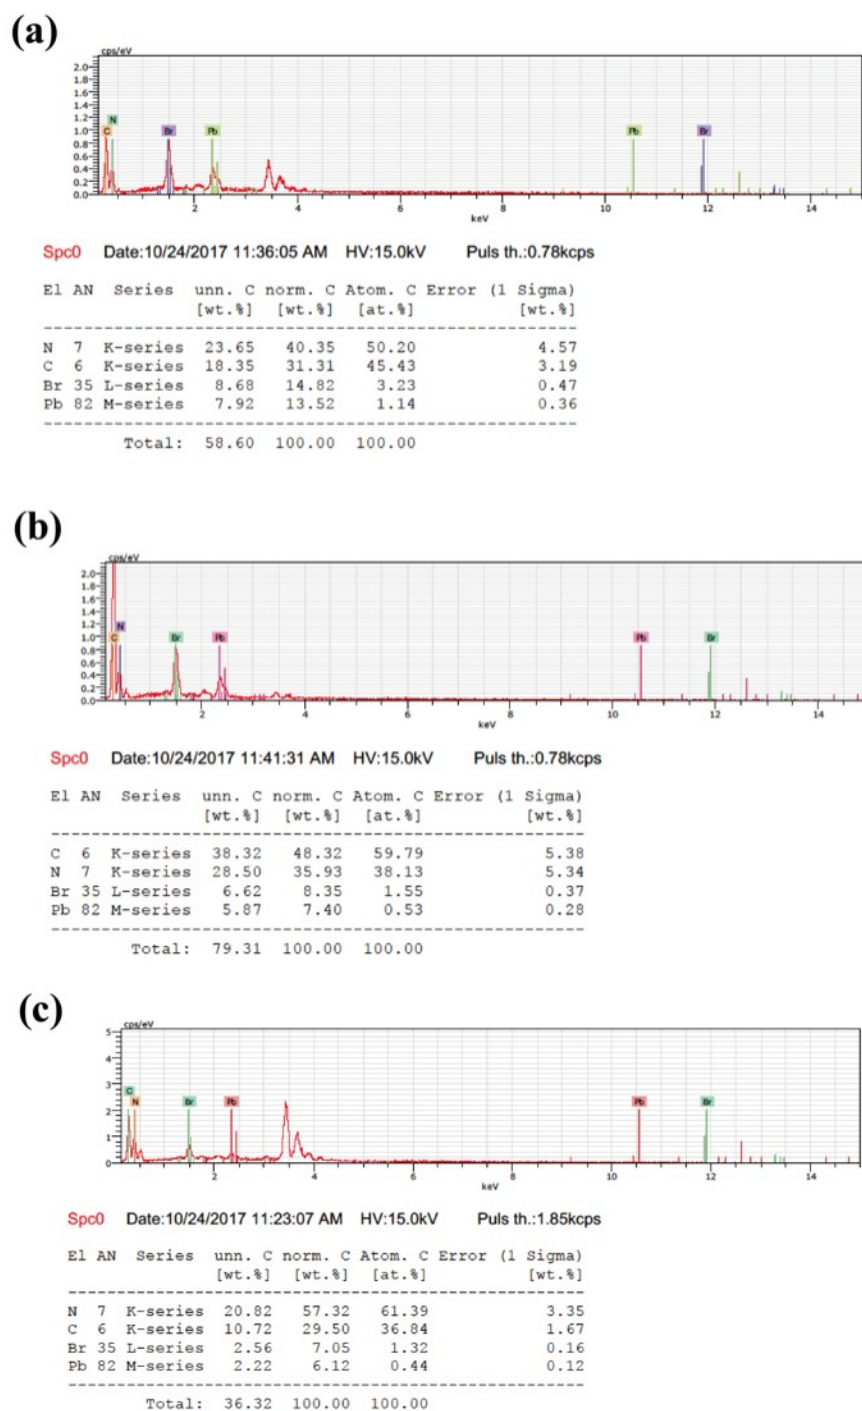

**Fig. S7** SEM-EDS measurement results of (a) MAPbBr<sub>3</sub>/p-g-C<sub>3</sub>N<sub>4</sub>-0.25, (b) MAPbBr<sub>3</sub>/p-g-C<sub>3</sub>N<sub>4</sub>-0.5, and (c) MAPbBr<sub>3</sub>/p-g-C<sub>3</sub>N<sub>4</sub>-1.0 NCs to identify their composition. Based on the wt.% values of Pb and Br and the formula, CH<sub>3</sub>NH<sub>3</sub>PbBr<sub>3</sub>, we can quantitatively calculate the total wt.% of MAPbBr<sub>3</sub> in MAPbBr<sub>3</sub>/p-g-C<sub>3</sub>N<sub>4</sub> NCs. The constitutions of MAPbBr<sub>3</sub> were 30.24, 16.80 and 14.05 wt.% in the MAPbBr<sub>3</sub>/p-g-C<sub>3</sub>N<sub>4</sub>-0.25, MAPbBr<sub>3</sub>/p-g-C<sub>3</sub>N<sub>4</sub>-0.5, and MAPbBr<sub>3</sub>/p-g-C<sub>3</sub>N<sub>4</sub>-1.0 NCs, respectively.
